# Supplementary material
Source: PubMed Central journal article supplement (PMC2972688)

**The novel chimeric natriuretic peptide CU-NP reduces cardiomyocyte hypertrophy through the NHE-1-calcineurin pathway**

Ana Kilić, Venkatesh Rajapurohitam, Sharon S Sandberg, Asad Zeidan, J Craig Hunter, Nazo Said Faruq, Candace Y Lee, John C Burnett Jr, Morris Karmazyn

**Supplemental Figures**

**Suppl Figure 1.** ANP and CNP inhibit cardiomyocyte hypertrophy. Panels A to C (cell surface area) and D to F (ANP expression) show that both ANP (100 nM) and CNP (100 nM) inhibit cardiomyocyte hypertrophy in response to 24 h treatment with PE (10  $\mu$ M), ang II (100 nM) or ET-1 (10 nM). Insets indicate a lack of direct effect of CNP or ANP on cell surface area or ANP expression in the absence of hypertrophic stimuli. Values for panels D to F represent fold increase and indicate means  $\pm$  SEM. N=6 per group; \*P<0.05 vs control, #P<0.05 vs hypertrophic stimuli. Ctl, control; PE, phenylephrine; Ang II, angiotensin II; ET-1, endothelin 1.

**Suppl Figure 2.** ANP and CNP inhibit increased NHE-1 expression in response to hypertrophic stimuli. Panel A (gene expression) and B (protein expression) show that both ANP (100 nM) and CNP (100 nM) inhibit NHE-1 upregulation in response to 24 h treatment with PE (10  $\mu$ M), ang II (100 nM) or ET-1 (10 nM). Results obtained with ANP and CNP were identical and therefore pooled for both natriuretic peptides (NP) for conciseness. Values represent fold increase and indicate means  $\pm$  SEM. Representative Western blots are given above bars in panel B. N=6 per group; \*P<0.05 vs control, #P<0.05 vs hypertrophic stimuli. Ctl, control; PE, phenylephrine; Ang II, angiotensin II; ET-1, endothelin 1.

**Suppl Figure 3.** ANP and CNP inhibit increased NHE-1 activity in response to hypertrophic stimuli. Panels show intracellular pH ( $\text{pH}_i$ ) recoveries after  $\text{NH}_4\text{Cl}$  pulsing in the presence of ANP (100 nM, A-C) or CNP (100 nM, D-F). Final PE, ang II and ET-1 concentrations were 10  $\mu$ M, 100 nM and 10 nM, respectively. Values indicate means  $\pm$  SEM. N=6 per group; \*P<0.05 vs other treatment groups. PE, phenylephrine; Ang II, angiotensin II; ET-1, endothelin 1.

**Suppl Figure 4.** ANP and CNP inhibit calcineurin activation and NFAT translocation in response to hypertrophic stimuli. Panel A shows that both ANP (100 nM) and CNP (100 nM)

inhibit calcineurin activation in response to 24 h treatment with PE (10  $\mu$ M), ang II (100 nM) or ET-1 (10 nM). Panel B depicts NFAT immunofluorescence staining for NFAT in the presence of hypertrophic stimuli and ANP whereas panel C shows ratio of the fluorescence intensity of the nuclear region to that of the entire region of the cell on a confocal plane. Results obtained with ANP and CNP were identical and therefore pooled for both natriuretic peptides (NP) for conciseness. Values indicate fold increase and are given as means  $\pm$  SEM. N=6. \*P<0.05 vs control, #P<0.05 vs hypertrophic stimuli. Ctl, control; PE, phenylephrine; Ang II, angiotensin II; ET-1, endothelin 1.

**Suppl Figure 5.** Lack of effect of CU-NP on hypertrophic responses in the presence of the natriuretic receptor blocker lysophosphatidic acid (LPA, 10  $\mu$ M) in terms of cell surface area (panel A) and ANP expression (panel B). Data represent 24 h treatment with PE (10  $\mu$ M), ang II (100 nM) or ET-1 (10 nM) and indicate means  $\pm$  SEM. Values for ANP indicate fold increase. N=6 per group; \*P<0.05 vs control. Ctl, control; PE, phenylephrine; Ang II, angiotensin II; ET-1, endothelin 1.

**Suppl Figure 6.** Lack of effect of CU-NP on NHE-1 upregulation in the presence of the natriuretic receptor blocker lysophosphatidic acid (LPA, 10  $\mu$ M) in terms of NHE-1 gene expression (panel A), protein expression (panel B) and NHE-1 activity following NH<sub>4</sub>Cl pulsing (panel C). Data represent 24 h treatment with PE (10  $\mu$ M), ang II (100 nM) or ET-1 (10 nM) and indicate means  $\pm$  SEM. Values in panels A and B indicate fold increase. Data with hypertrophic agonists in panel C were pooled for clarity as all agonists produced identical effects on pH<sub>i</sub> recovery and all treatments were carried out in the presence of LPA. N=6 (panels A and B) or 9

(panel C) per group; \*P<0.05 vs control. Ctl, control; PE, phenylephrine; Ang II, angiotensin II; ET-1, endothelin 1.

**Suppl Figure 7.** Lack of effect of CU-NP on calcineurin activation in the presence of the natriuretic receptor blocker lysophosphatidic acid (LPA, 10  $\mu$ M). Data represent 24 h treatment with PE (10  $\mu$ M), ang II (100 nM) or ET-1 (10 nM) and indicate means  $\pm$  SEM. Values indicate fold increase. N=6 per group; \*P<0.05 vs control. Ctl, control; PE, phenylephrine; Ang II, angiotensin II; ET-1, endothelin 1.

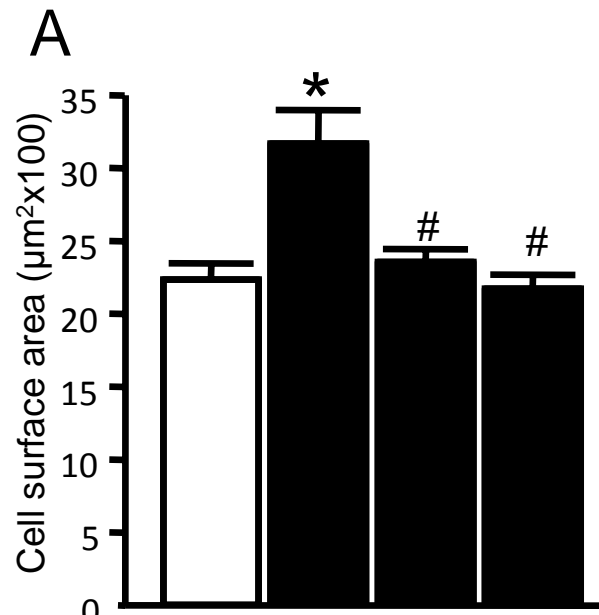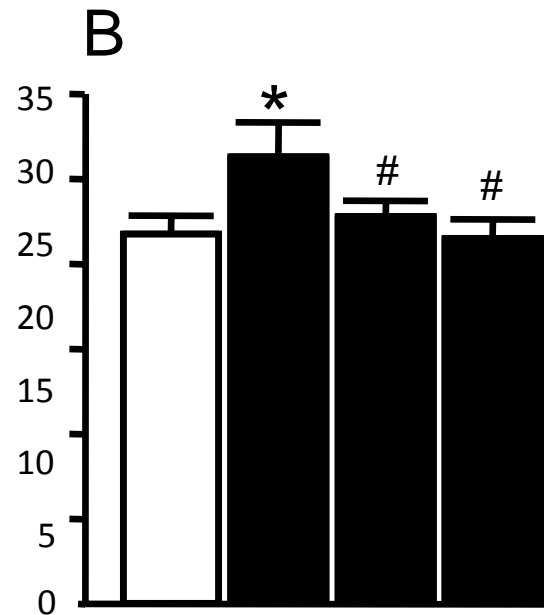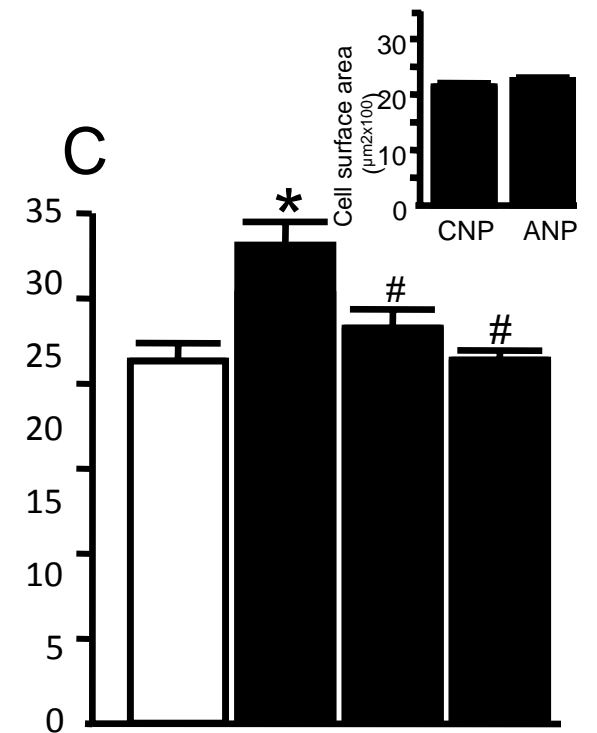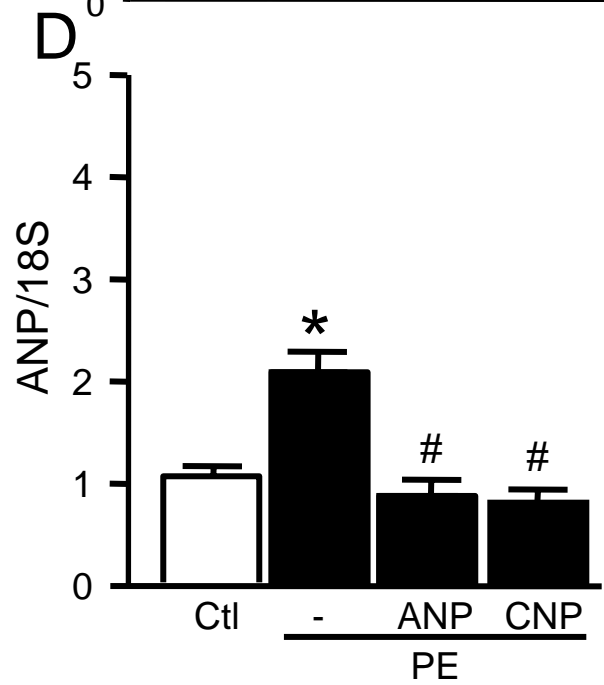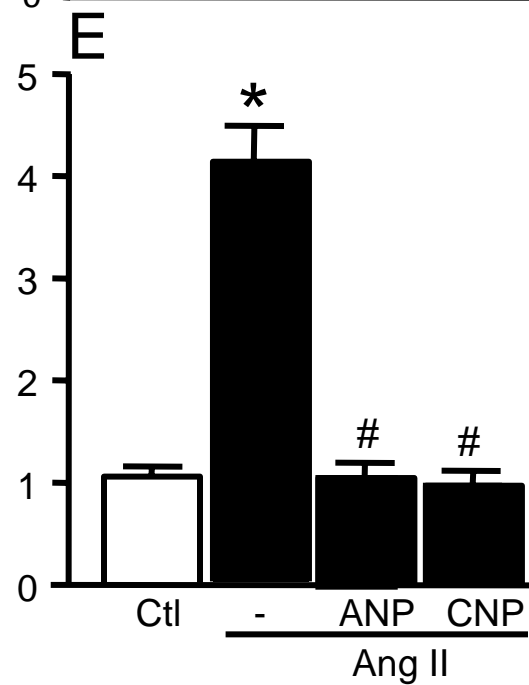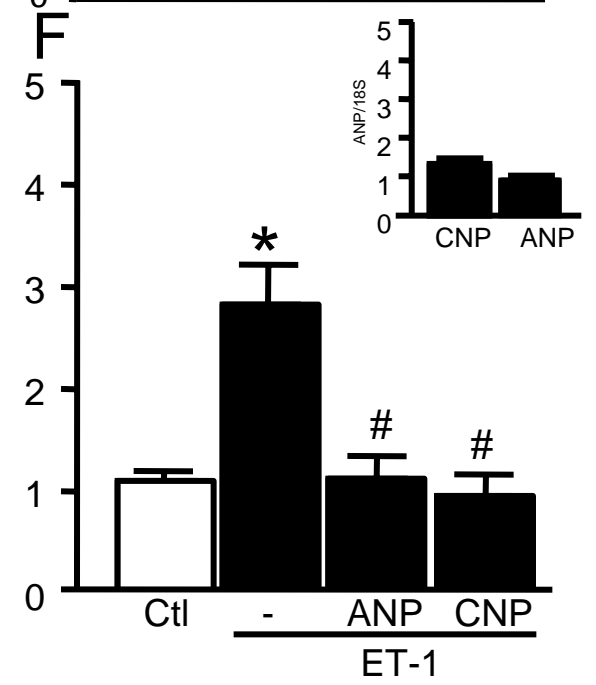

A

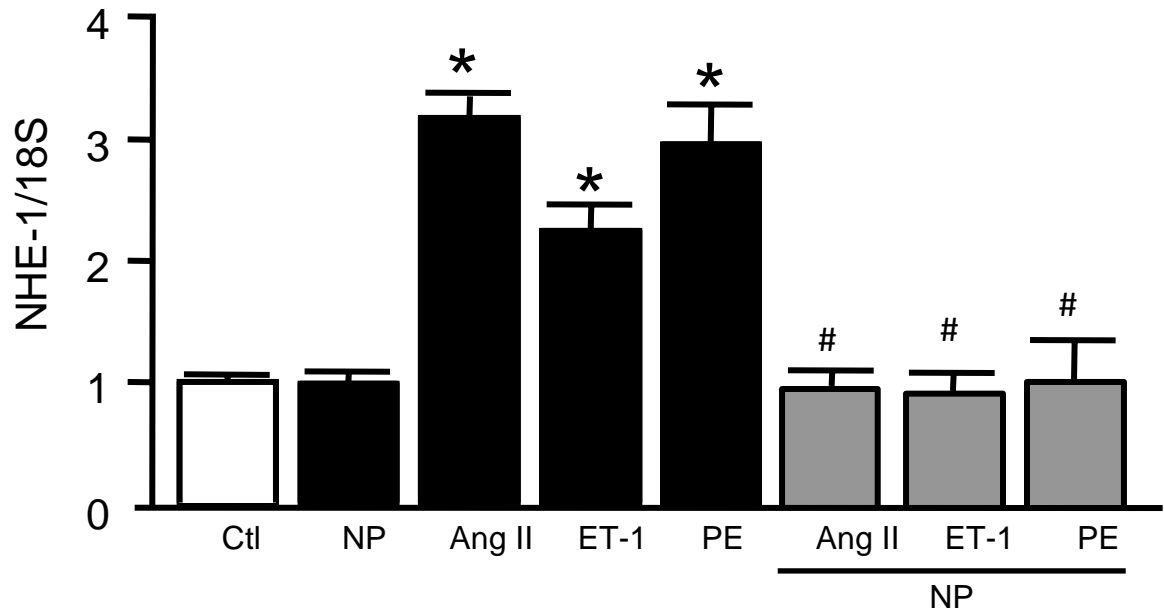

B

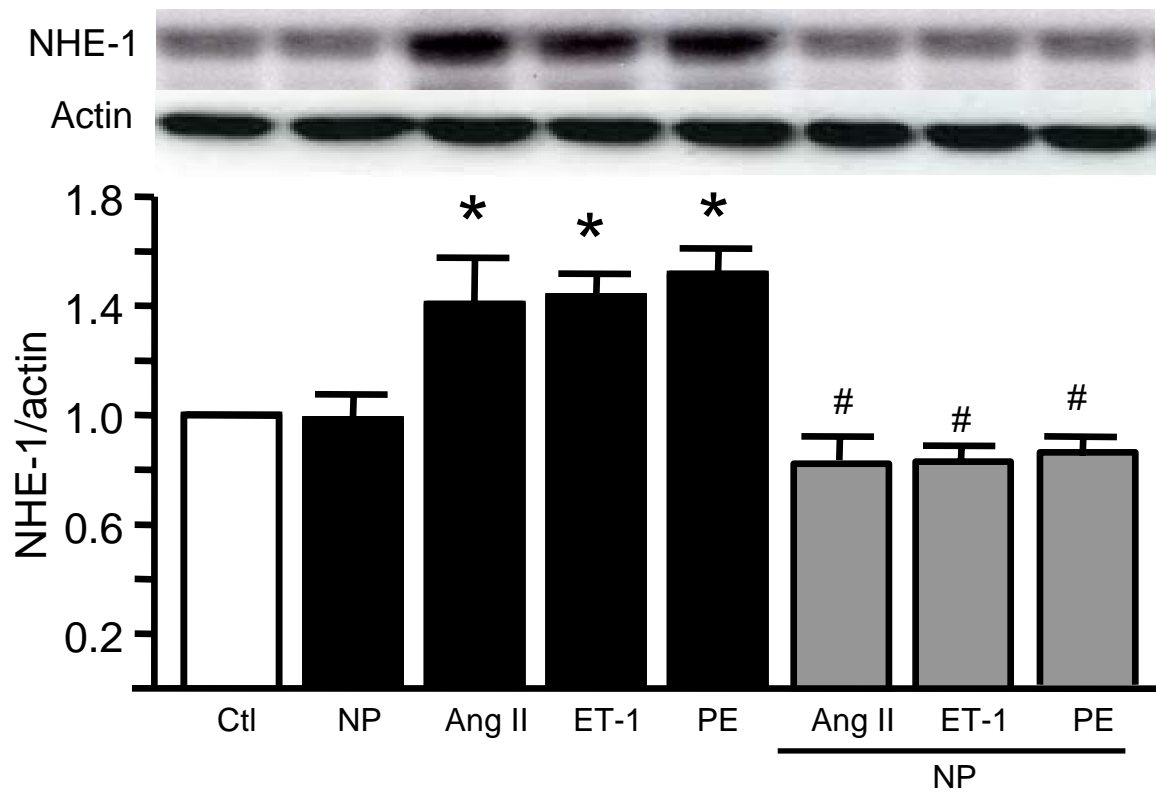

**ANP A**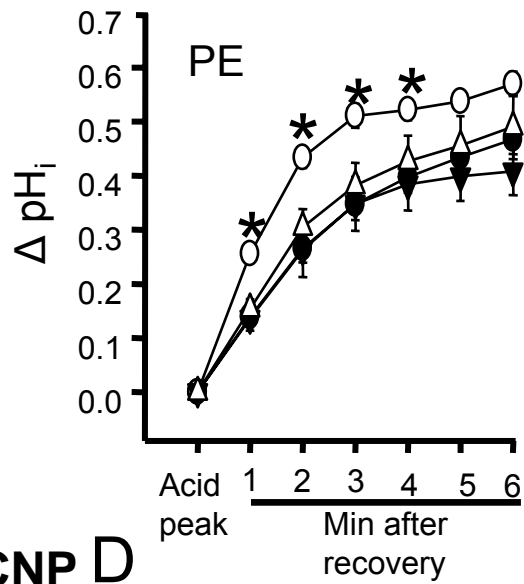**B**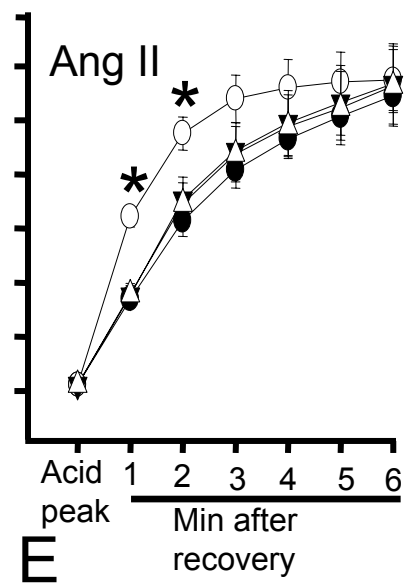**C**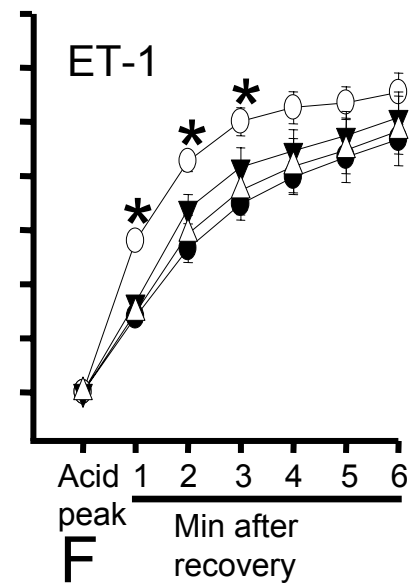**CNP D**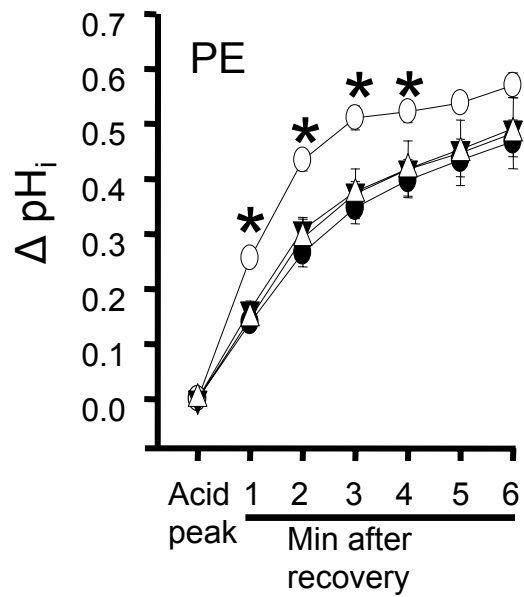**E**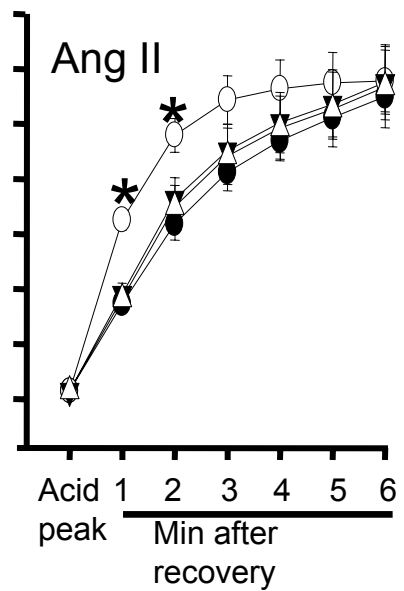**F**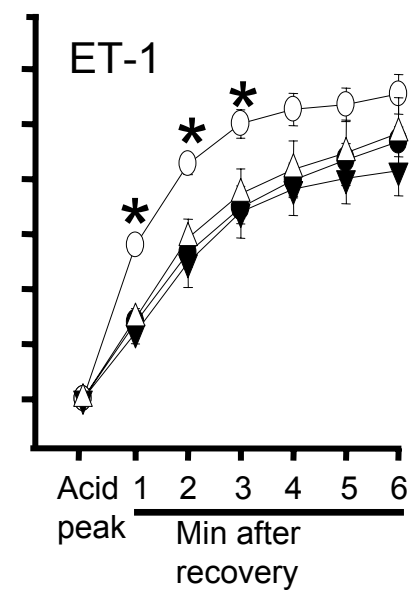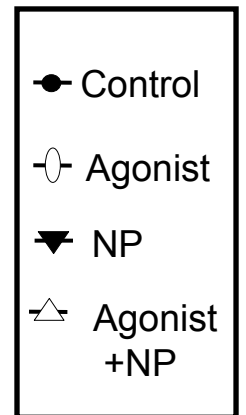

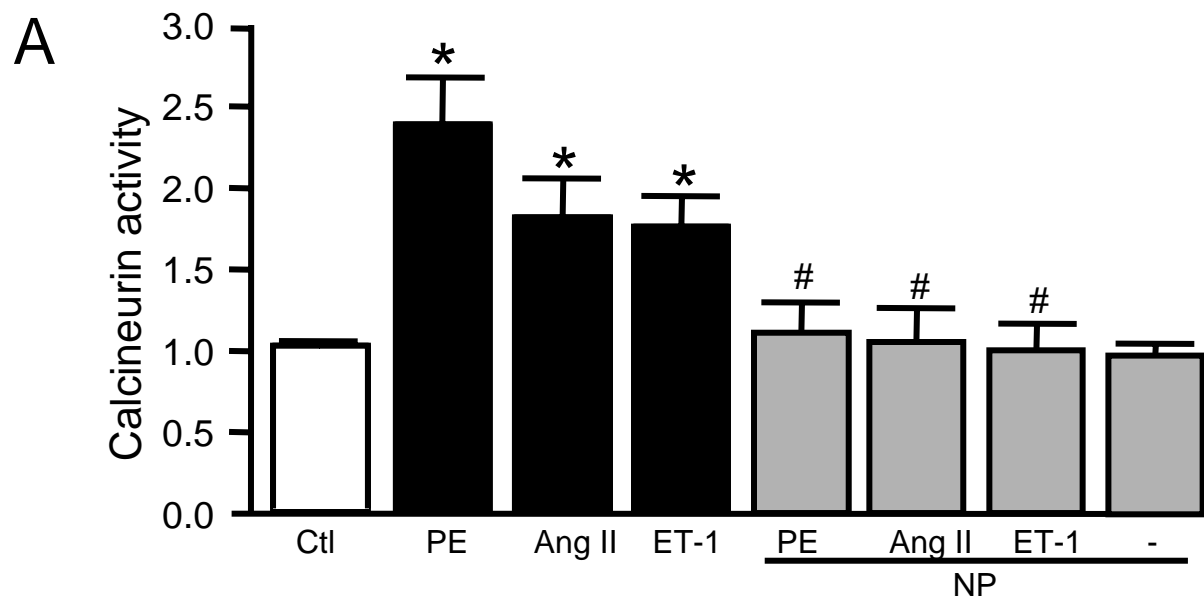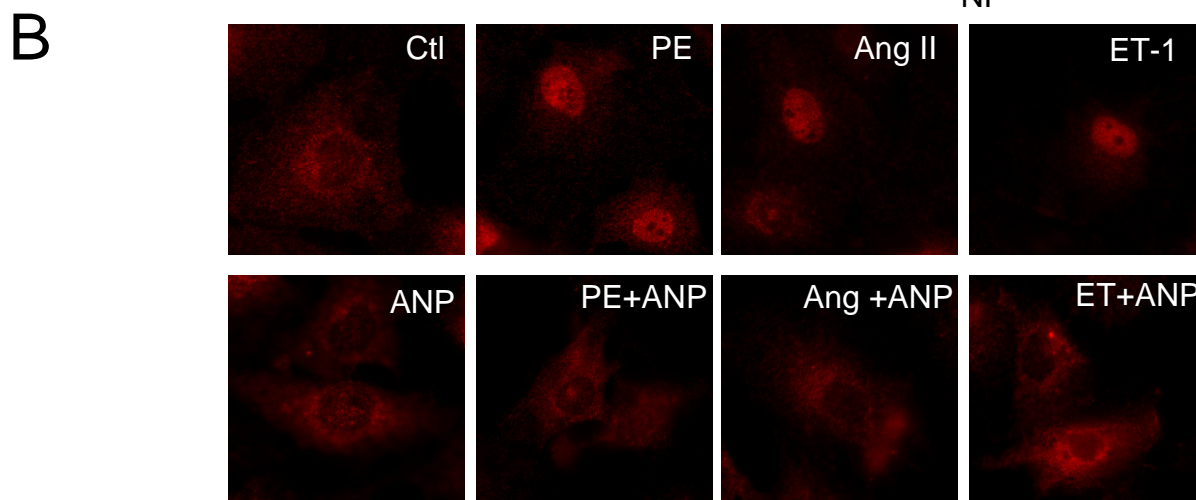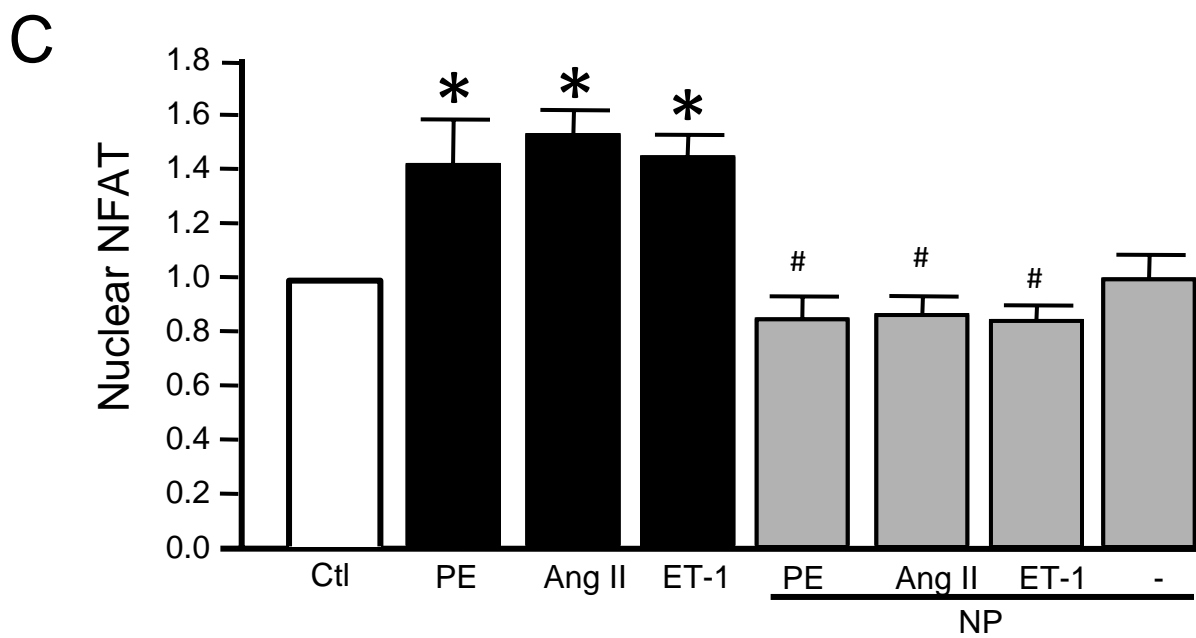



A

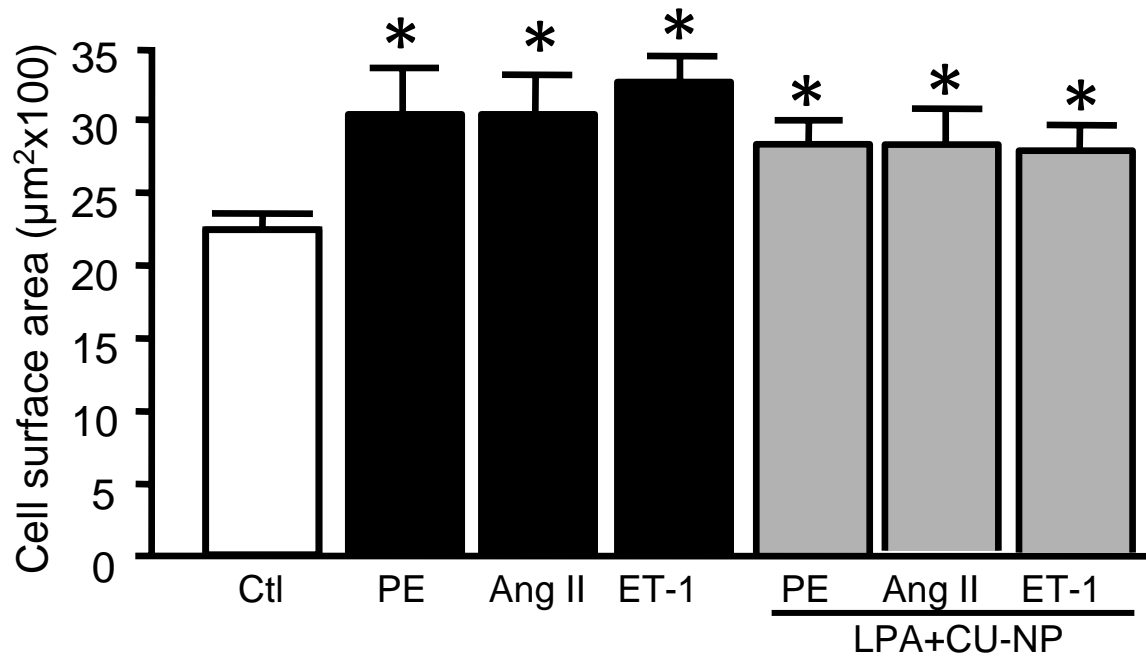

B

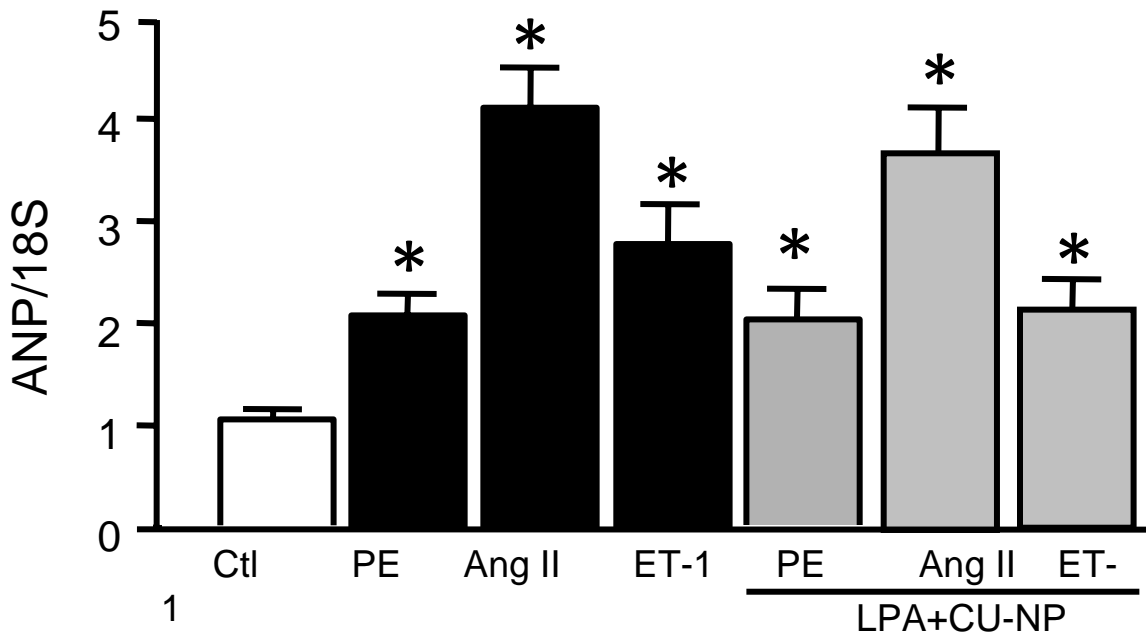

A

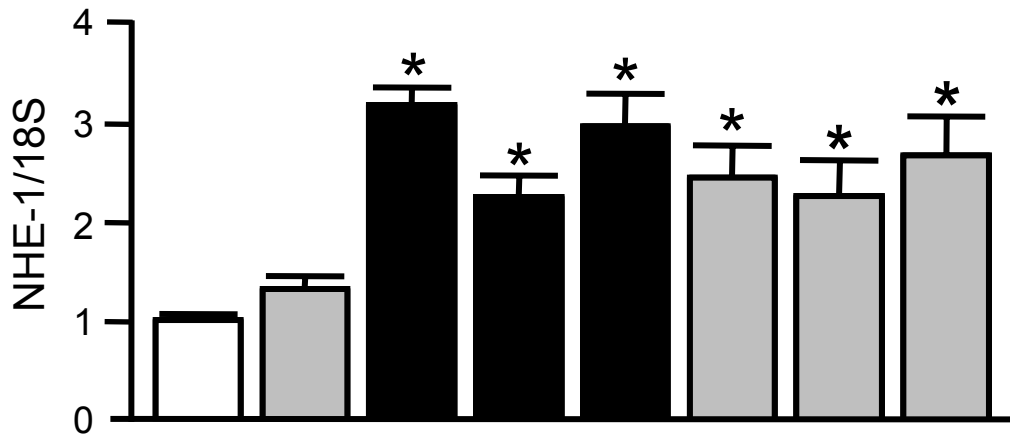

B

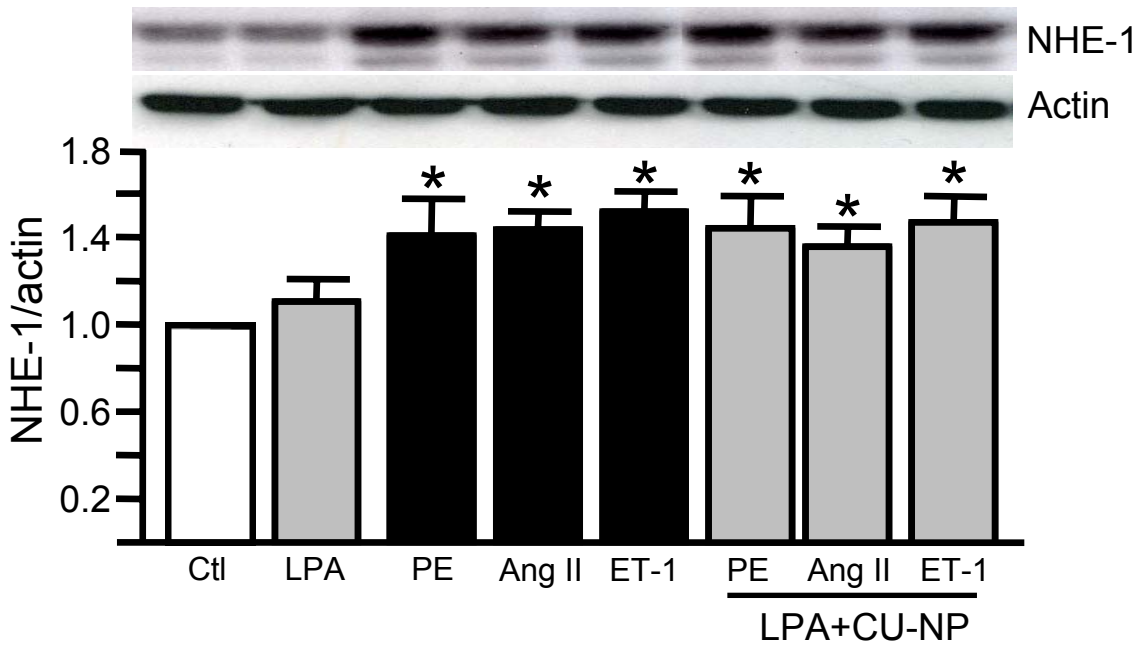

C

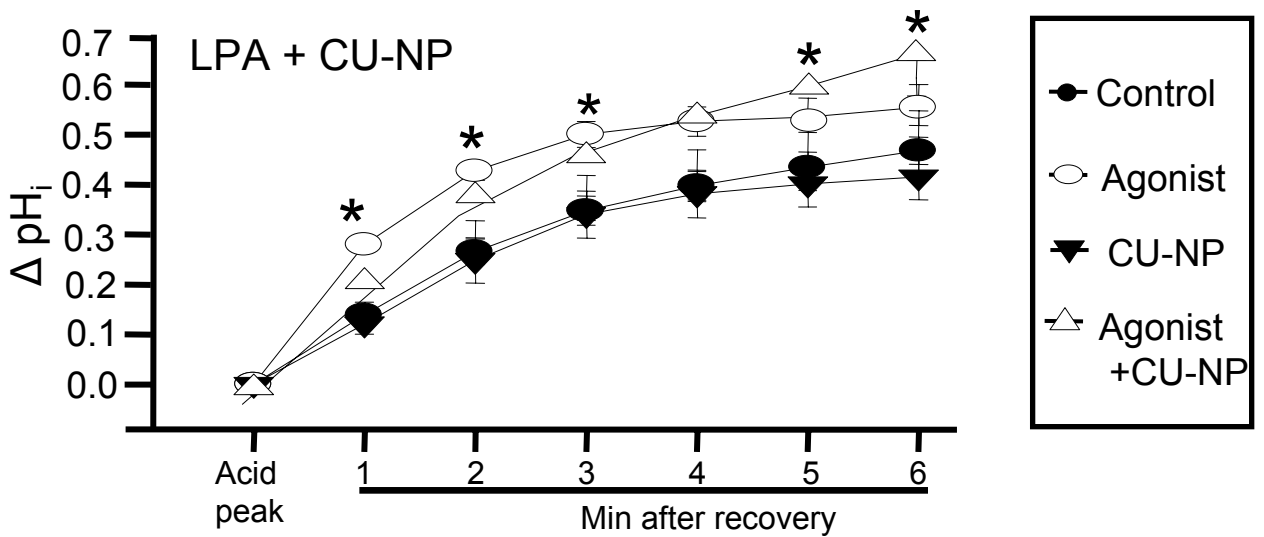

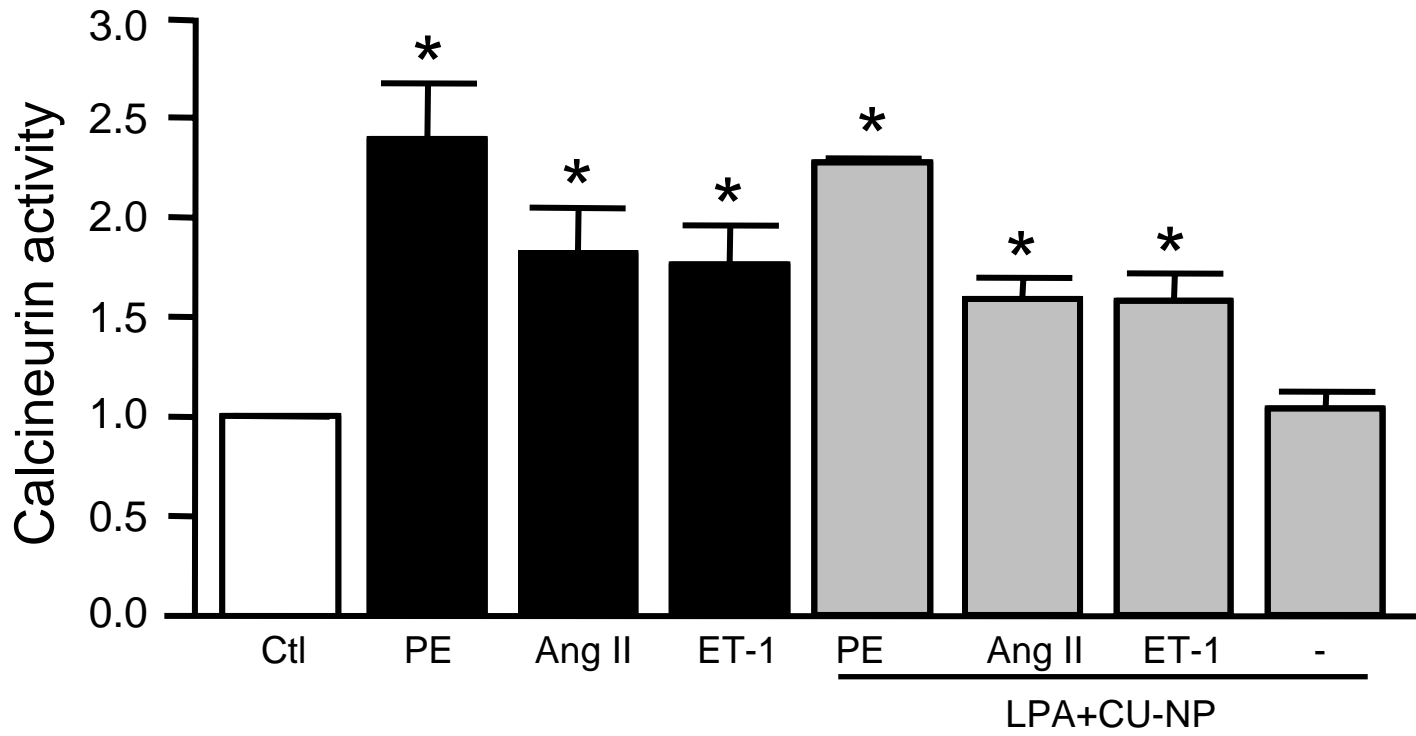

Supplement: supp_cvq254_cvq254supp.pdf [file supp_cvq254_cvq254supp.pdf]
